# Supplementary material for: Pretreatment gut microbiome predicts chemotherapy-related bloodstream infection
Source: PubMed Central journal article supplement (PMC4848771; doi:10.1186/s13073-016-0301-4), 2016-04-28
Supplement: 13073_2016_301_MOESM3_ESM.pdf [file 13073_2016_301_MOESM3_ESM.pdf]

| <b>Covariate</b>              | <b>Taxon</b>                                                                                                   | <b>P value</b>  | <b>FDR-corrected P value</b> | <b>coefficient</b>   |
|-------------------------------|----------------------------------------------------------------------------------------------------------------|-----------------|------------------------------|----------------------|
| Previous use of penicillin V  | k__Bacteria;p__Firmicutes;c__Clostridia;o__Clostridiales;Other;Other                                           | 0.01566264      | 0.76425058<br>1              | 0.01029010<br>4      |
| Previous use of penicillin V  | k__Bacteria;p__Bacteroidetes;c__Flavobacteriia;o__Flavobacteriales;f__Flavobacteriaceae;g__                    | 0.02812016<br>9 | 0.76425058<br>1              | -4.86E-005           |
| Previous use of penicillin V  | k__Bacteria;p__Firmicutes;c__Clostridia;o__Clostridiales;f__Ruminococcaceae;g__Oscillospira                    | 0.02998788<br>6 | 0.76425058<br>1              | 0.00191585<br>4      |
| Previous use of penicillin V  | k__Bacteria;p__Proteobacteria;c__Gammaproteobacteria;o__Enterobacteriales;f__Enterobacteriaceae;g__Citrobacter | 0.03021339<br>1 | 0.76425058<br>1              | -<br>0.00014001<br>4 |
| Previous use of penicillin V  | k__Bacteria;p__Firmicutes;c__Erysipelotrichi;o__Erysipelotrichales;f__Erysipelotrichaceae;g__                  | 0.03393769<br>4 | 0.76425058<br>1              | -<br>0.00143986<br>4 |
| <b>Covariate</b>              | <b>Taxon</b>                                                                                                   | <b>P value</b>  | <b>FDR-corrected P value</b> | <b>coefficient</b>   |
| Previous use of cotrimoxazole | k__Bacteria;p__Firmicutes;c__Clostridia;o__Clostridiales;Other;Other                                           | 0.01659753<br>8 | 0.73844639<br>6              | -<br>0.00924830<br>3 |
| Previous use of cotrimoxazole | k__Bacteria;p__Firmicutes;c__Erysipelotrichi;o__Erysipelotrichales;f__Erysipelotrichaceae;g__Coprobaillus      | 0.01925052<br>8 | 0.73844639<br>6              | 3.78E-005            |
| Previous use of cotrimoxazole | k__Bacteria;p__Firmicutes;c__Bacilli;o__Lactobacillales;f__Leuconostocaceae;g__Leuconostoc                     | 0.02003151      | 0.73844639<br>6              | 0.00026292<br>6      |
| Previous use of cotrimoxazole | k__Bacteria;p__Proteobacteria;c__Betaproteobacteria;o__Burkholderiales;f__Oxalobacteraceae;g__                 | 0.02264809<br>4 | 0.73844639<br>6              | -5.88E-005           |
| Previous use of cotrimoxazole | k__Bacteria;p__Bacteroidetes;c__Bacteroidia;o__Bacteroidales;f__Rikenellaceae;Other                            | 0.03776668      | 0.73844639<br>6              | -2.42E-005           |

**Additional file 3. Association using a linear model of antibiotic prophylaxis and microbiome composition collapsed at genus level**
