# Supplementary material for: Pretreatment gut microbiome predicts chemotherapy-related bloodstream infection
Source: PubMed Central journal article supplement (PMC4848771; doi:10.1186/s13073-016-0301-4), 2016-04-28
Supplement: 13073_2016_301_MOESM4_ESM.pdf [file 13073_2016_301_MOESM4_ESM.pdf]

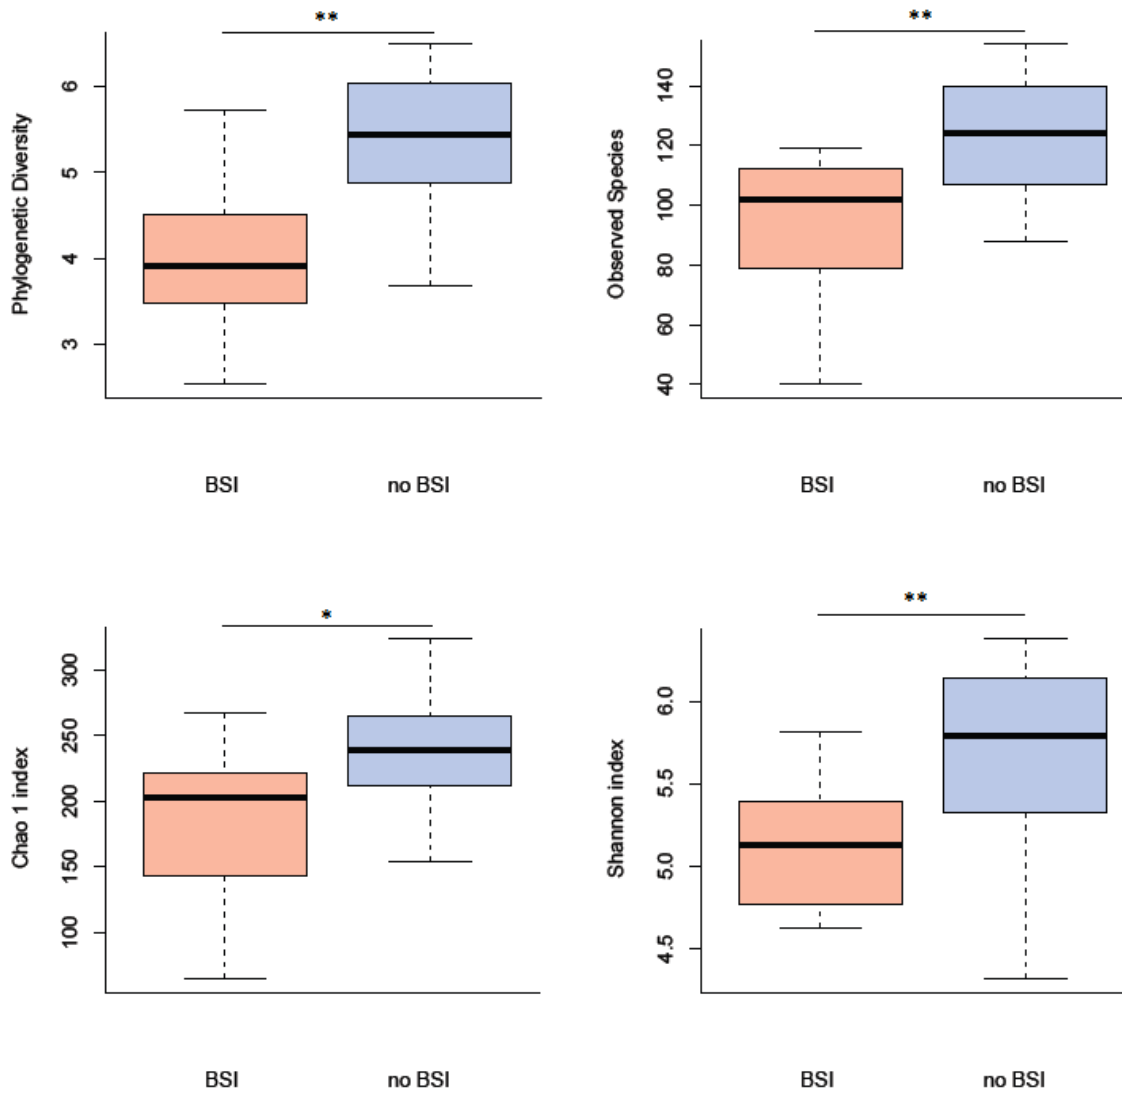

**Additional File 4, Figure 1.** Observed differences in diversity persist after rarefaction of OTU counts at 500 observations per sample.

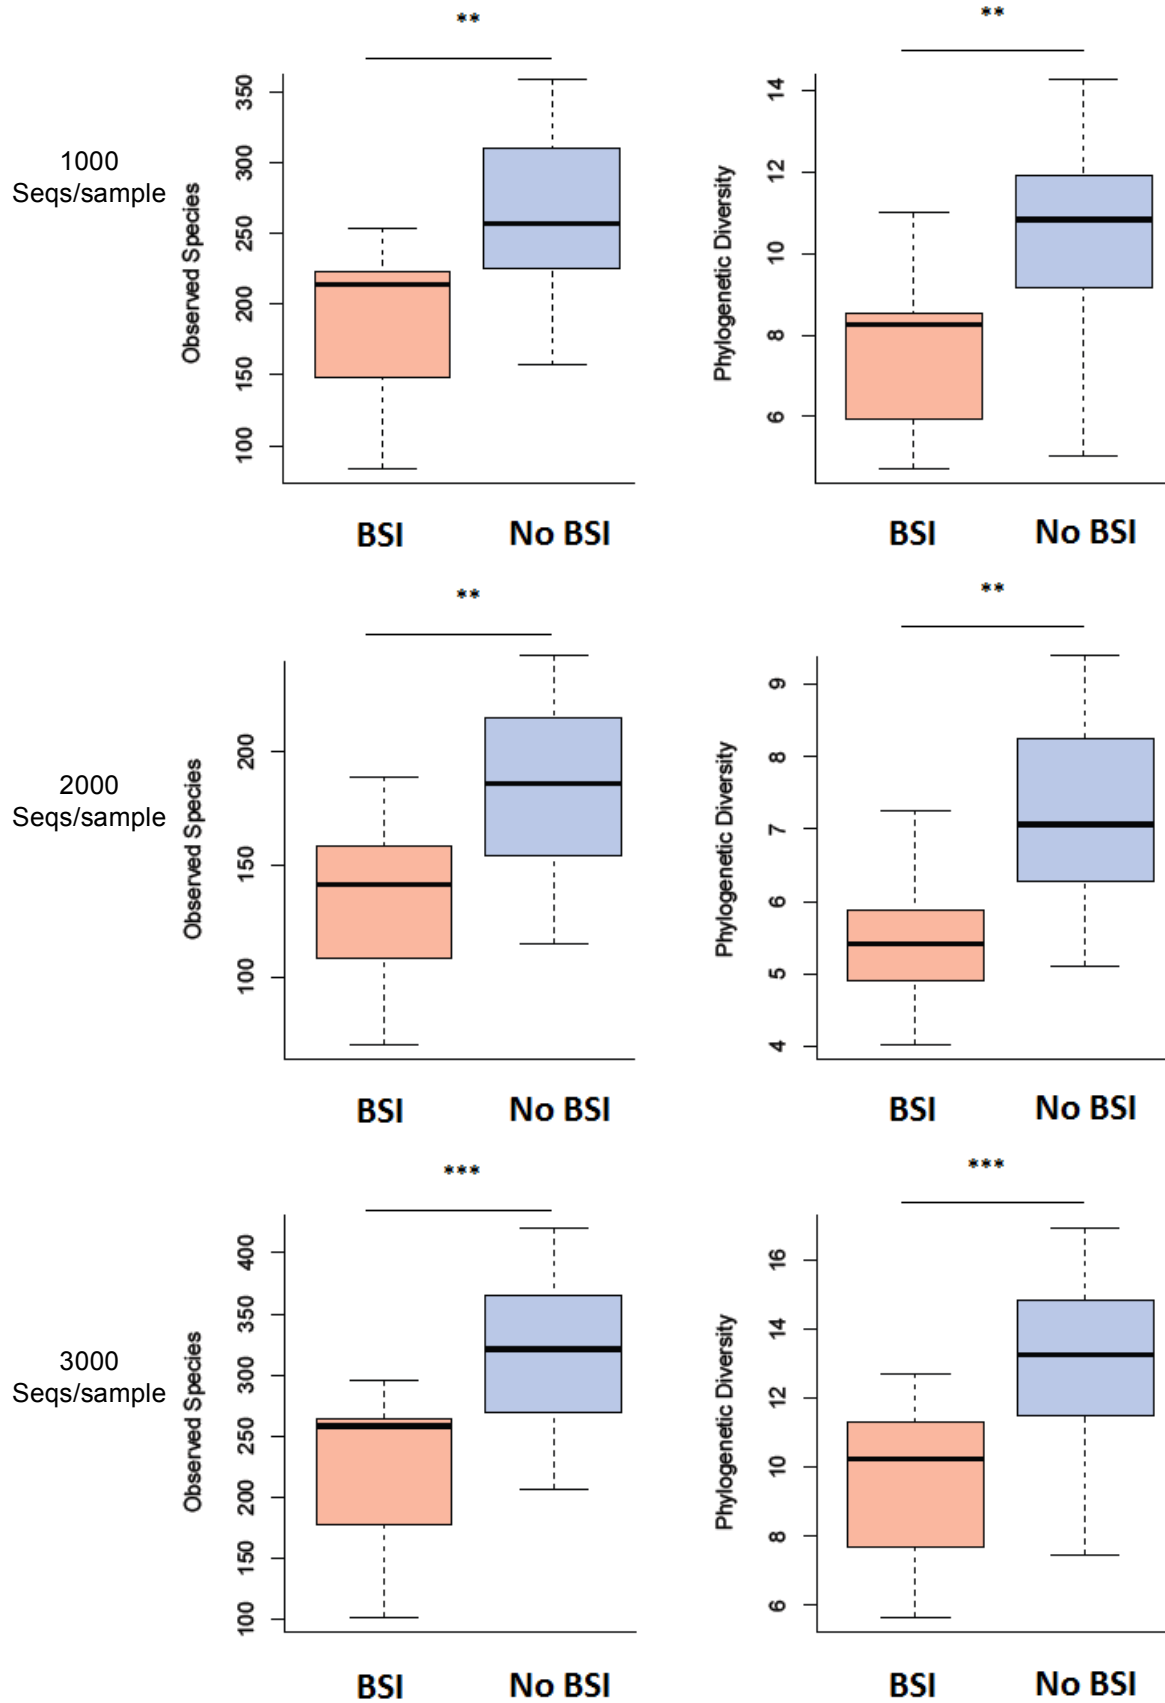

**Additional File 4, Figure 2.** Observed differences in diversity persist after re-picking OTUs using even depths of 1,000, 2,000, and 3,000 sequences per sample.
