# Supplementary material for: Pretreatment gut microbiome predicts chemotherapy-related bloodstream infection
Source: PubMed Central journal article supplement (PMC4848771; doi:10.1186/s13073-016-0301-4), 2016-04-28
Supplement: 13073_2016_301_MOESM5_ESM.pdf [file 13073_2016_301_MOESM5_ESM.pdf]

| Feature                                                                                           | P value     | FDR-corrected P value | Mean in BSI samples | Mean in no BSI samples |
|---------------------------------------------------------------------------------------------------|-------------|-----------------------|---------------------|------------------------|
| k__Bacteria;p__Bacteroidetes;c__Bacteroidia;o__Bacteroidales;f__[Barnesiellaceae]                 | 4.80123E-05 | 0.002160555           | 0                   | 0.030608691            |
| k__Bacteria;p__Firmicutes;c__Clostridia;o__Clostridiales;f__Christensenellaceae                   | 0.000976047 | 0.021961056           | 0.017263335         | 0.061397059            |
| k__Bacteria;p__Proteobacteria;c__Deltaproteobacteria;o__Desulfovibrionales;f__Desulfovibrionaceae | 0.002583052 | 0.038745776           | 0.009117493         | 0.035661785            |
| k__Bacteria;p__Firmicutes;c__Clostridia;o__Clostridiales;f__Dehalobacteriaceae                    | 0.005454802 | 0.061366525           | 0                   | 0.008590271            |
| k__Bacteria;p__Proteobacteria;c__Betaproteobacteria;o__Burkholderiales;f__Alcaligenaceae          | 0.008700052 | 0.077199038           | 0.00824569          | 0.0361082              |
| k__Bacteria;p__Tenericutes;c__Mollicutes;o__RF39;f__                                              | 0.010293205 | 0.077199038           | 0                   | 0.033369899            |
| k__Bacteria;p__Proteobacteria;c__Betaproteobacteria;o__Burkholderiales;f__Oxalobacteraceae        | 0.015134529 | 0.085608235           | 0.003111599         | 0.011823771            |
| k__Bacteria;p__Bacteroidetes;c__Bacteroidia;o__Bacteroidales;f__[Odoribacteraceae]                | 0.015219242 | 0.085608235           | 0.01364343          | 0.037690691            |
| k__Bacteria;p__Firmicutes;c__Bacilli;o__Lactobacillales;f__Lactobacillaceae                       | 0.036943059 | 0.157390604           | 0.111370127         | 0.017814454            |
| k__Bacteria;p__Firmicutes;c__Clostridia;o__Clostridiales;f__                                      | 0.038473259 | 0.157390604           | 0.142158954         | 0.238485423            |
| k__Bacteria;p__Firmicutes;c__Clostridia;o__Clostridiales;f__Ruminococcaceae                       | 0.038473259 | 0.157390604           | 0.36528884          | 0.462636458            |

**Additional file 5 A) Families that differ between fecal samples collected prior to treatment in patients who did or did not develop BSI. (Mann-Whitney U test, False Discovery Rate (FDR)-corrected). BSI : Bloodstream Infection.**

| Feature                                                                                                            | P value     | FDR-corrected P value | Mean in BSI samples | Mean in no BSI samples |
|--------------------------------------------------------------------------------------------------------------------|-------------|-----------------------|---------------------|------------------------|
| k__Bacteria;p__Bacteroidetes;c__Bacteroidia;o__Bacteroidales;f__[Barnesiellaceae];g__                              | 4.80123E-05 | 0.0035049             | 0                   | 0.030608691            |
| k__Bacteria;p__Firmicutes;c__Clostridia;o__Clostridiales;f__Christensenellaceae;g__                                | 0.002715736 | 0.093925496           | 0.009486937         | 0.051637282            |
| k__Bacteria;p__Firmicutes;c__Clostridia;o__Clostridiales;f__Ruminococcaceae;g__Faecalibacterium                    | 0.004106589 | 0.093925496           | 0.075943204         | 0.157567367            |
| k__Bacteria;p__Firmicutes;c__Clostridia;o__Clostridiales;f__Dehalobacteriaceae;g__Dehalobacterium                  | 0.005454802 | 0.093925496           | 0                   | 0.008110837            |
| k__Bacteria;p__Proteobacteria;c__Deltaproteobacteria;o__Desulfovibrionales;f__Desulfovibrionaceae;g__Desulfovibrio | 0.006485006 | 0.093925496           | 0.001185782         | 0.022130464            |
| k__Bacteria;p__Proteobacteria;c__Betaproteobacteria;o__Burkholderiales;f__Alcaligenaceae;g__Suttrella              | 0.008700052 | 0.093925496           | 0.00824569          | 0.0361082              |
| k__Bacteria;p__Proteobacteria;c__Betaproteobacteria;o__Burkholderiales;f__Oxalobacteraceae;g__Oxalobacter          | 0.010293205 | 0.093925496           | 0                   | 0.008363649            |
| k__Bacteria;p__Tenericutes;c__Mollicutes;o__RF39;f__;g__                                                           | 0.010293205 | 0.093925496           | 0                   | 0.033369899            |
| k__Bacteria;p__Firmicutes;c__Clostridia;o__Clostridiales;f__Veillonellaceae;g__Veillonella                         | 0.014371074 | 0.116565377           | 0.023380631         | 0.002898584            |
| k__Bacteria;p__Firmicutes;c__Clostridia;o__Clostridiales;f__Christensenellaceae;g__Christensenella                 | 0.016143634 | 0.117848525           | 0.012657346         | 0.026329171            |
| k__Bacteria;p__Firmicutes;c__Clostridia;o__Clostridiales;f__Ruminococcaceae;g__Oscillospira                        | 0.018671821 | 0.118013149           | 0.039894856         | 0.072200504            |
| k__Bacteria;p__Bacteroidetes;c__Bacteroidia;o__Bacteroidales;f__[Odoribacteraceae];g__Butyricimonas                | 0.019399422 | 0.118013149           | 0.005621577         | 0.018437991            |
| k__Bacteria;p__Firmicutes;c__Erysipelotrichi;o__Erysipelotrichales;f__Erysipelotrichaceae;g__                      | 0.02394951  | 0.134485712           | 0.082986672         | 0.029542167            |

**Additional file 5 B) Genera that differ between fecal samples collected prior to treatment in patients who did or did not develop BSI. (Mann-Whitney U test, False Discovery Rate (FDR)-corrected). BSI : Bloodstream Infection.**
