# Supplementary material for: Pretreatment gut microbiome predicts chemotherapy-related bloodstream infection
Source: PubMed Central journal article supplement (PMC4848771; doi:10.1186/s13073-016-0301-4), 2016-04-28

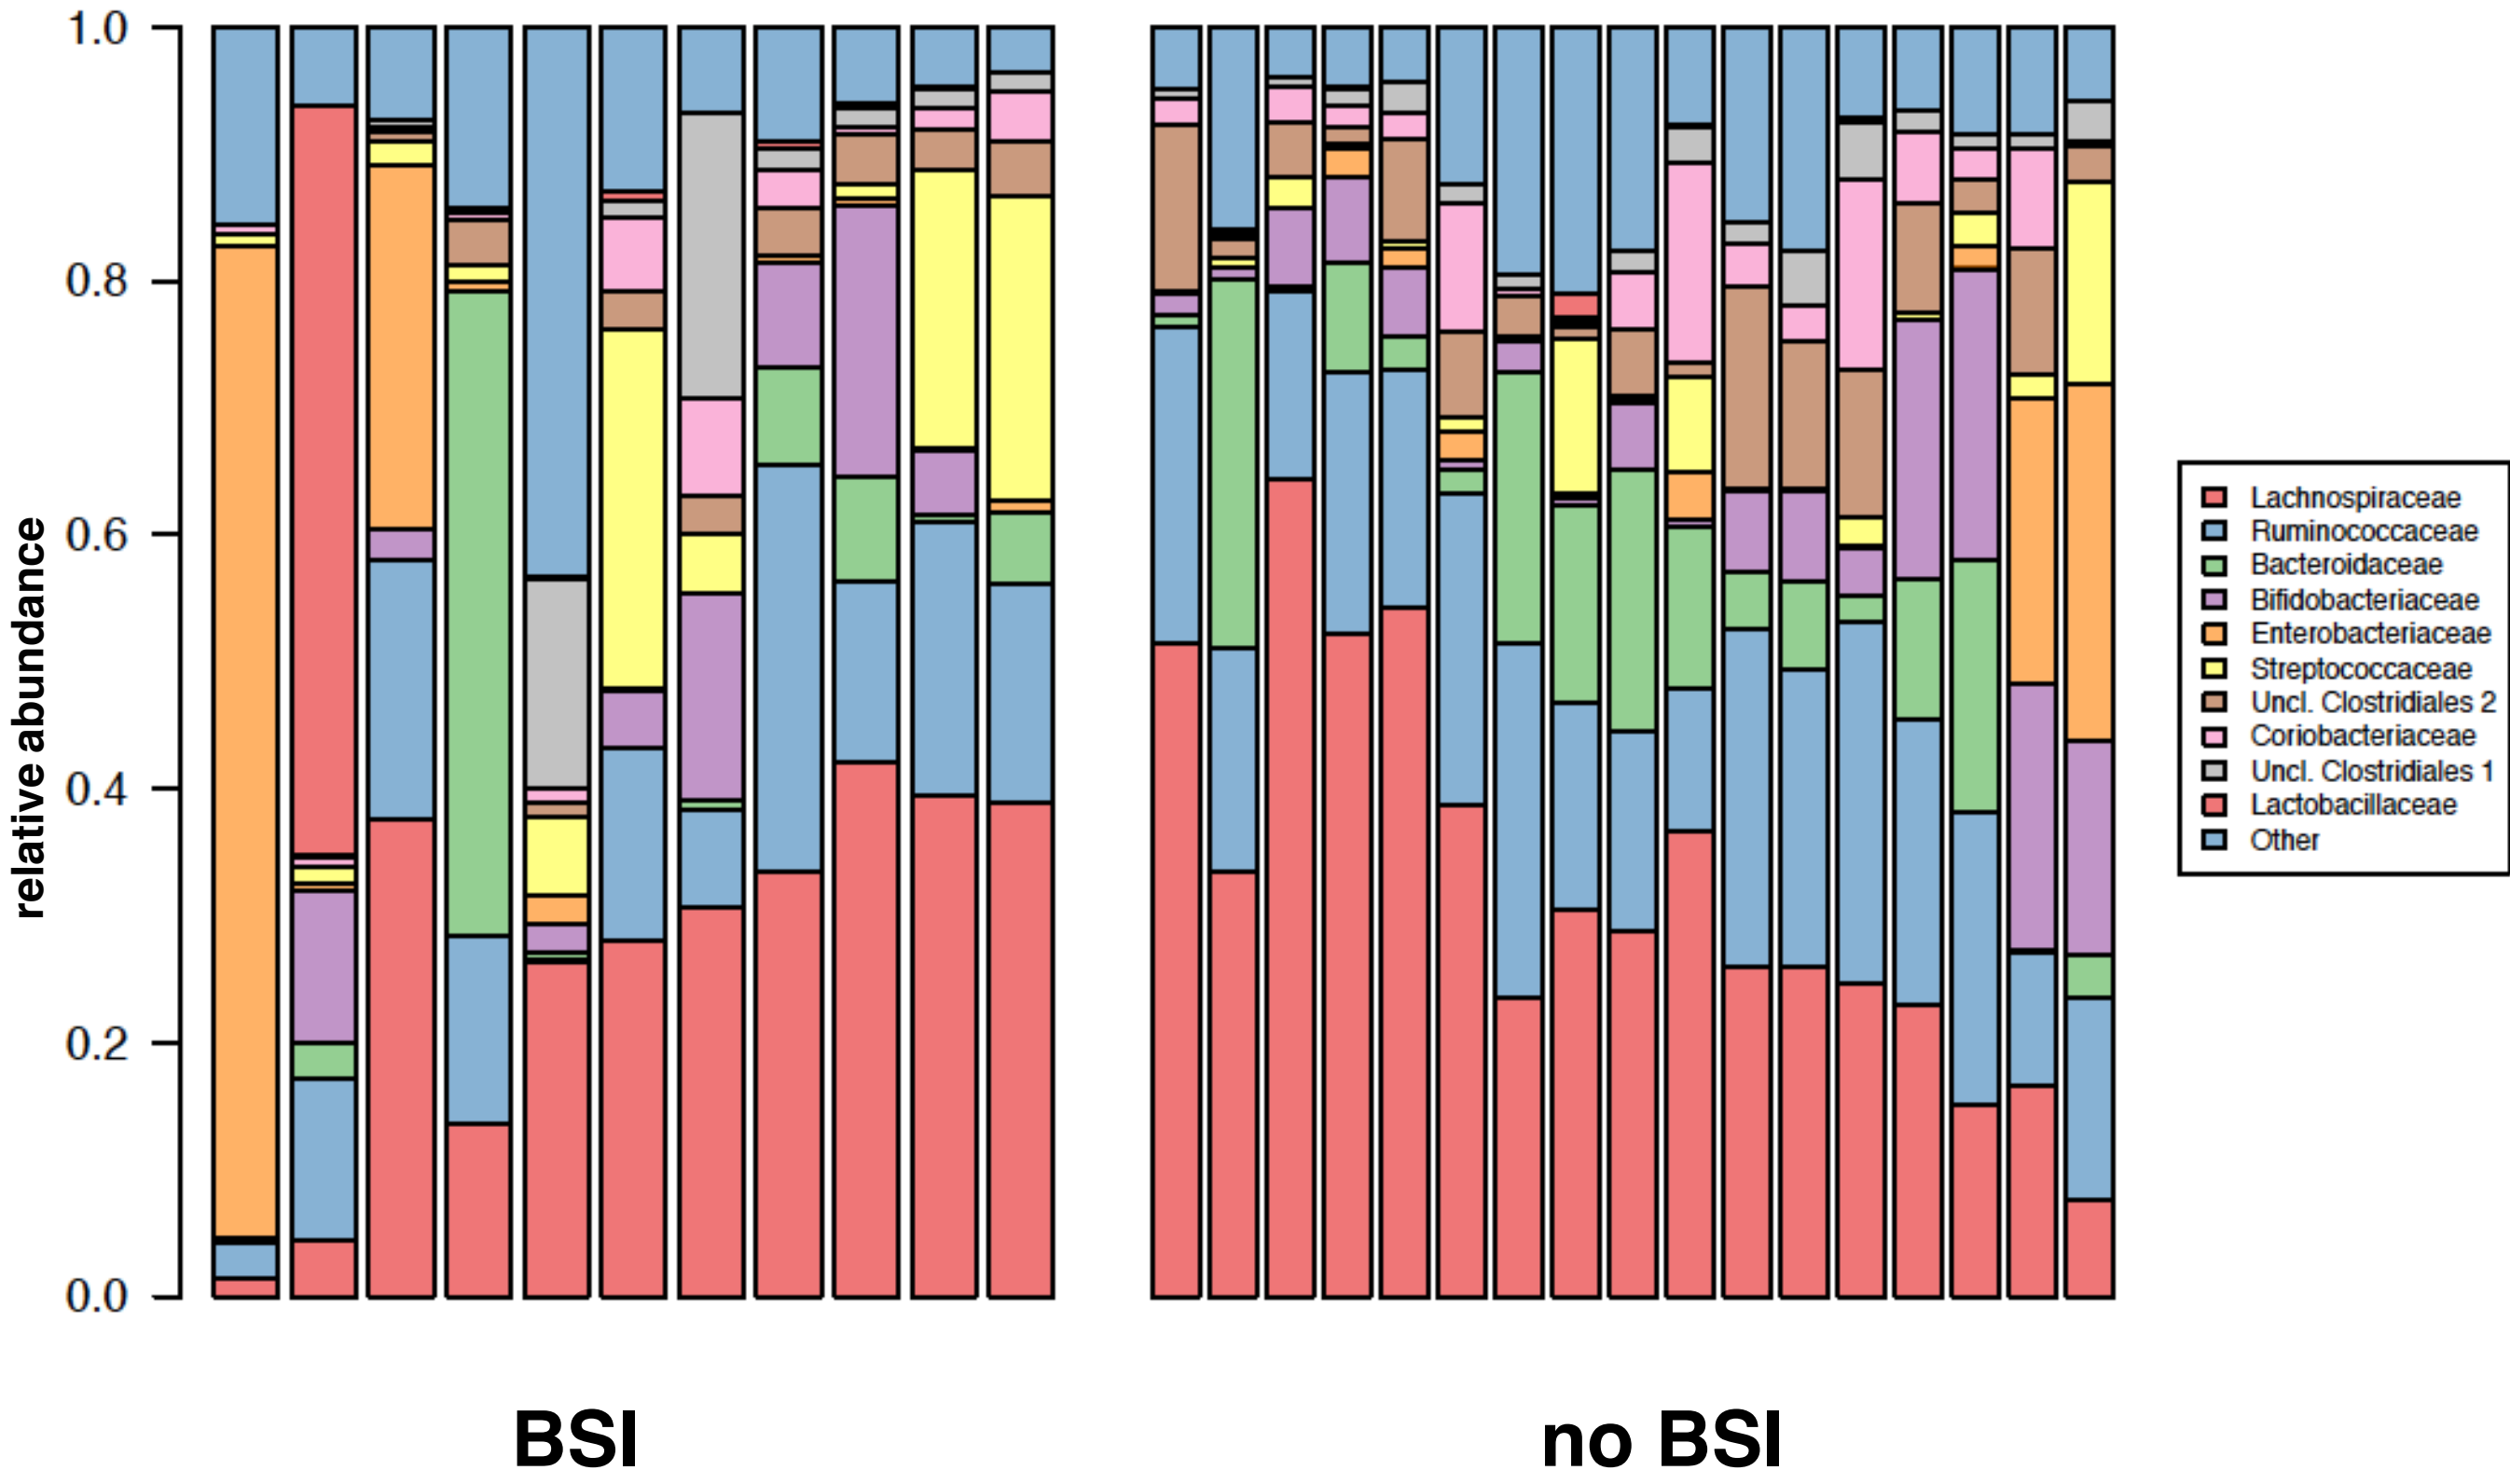

Supplement: 13073_2016_301_MOESM6_ESM.pdf [file 13073_2016_301_MOESM6_ESM.pdf]
