# Supplementary material for: Pretreatment gut microbiome predicts chemotherapy-related bloodstream infection
Source: PubMed Central journal article supplement (PMC4848771; doi:10.1186/s13073-016-0301-4), 2016-04-28

**Uncl. [Barnesiellaceae]**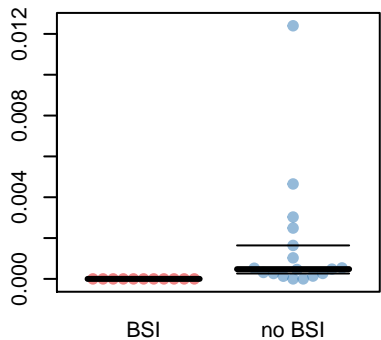**Uncl. Christensenellaceae**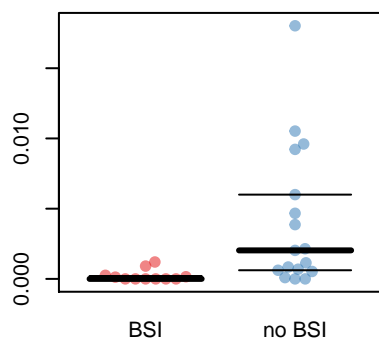**Faecalibacterium**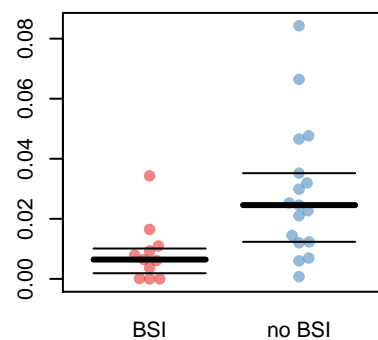**Dehalobacterium**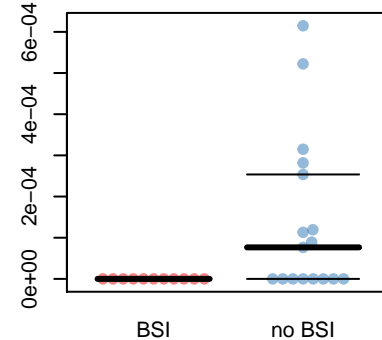**Desulfovibrio**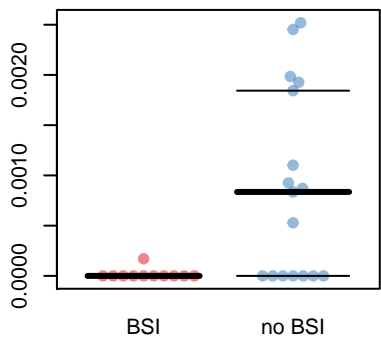**Sutterella**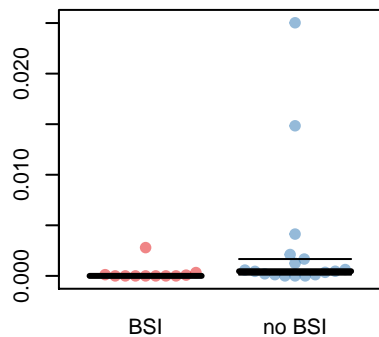**Oxalobacter**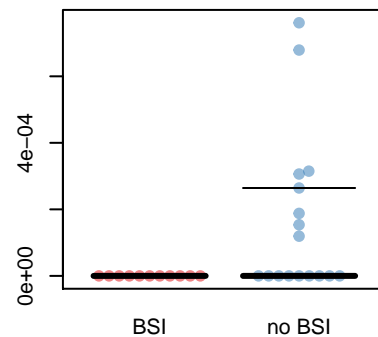**Uncl. RF39**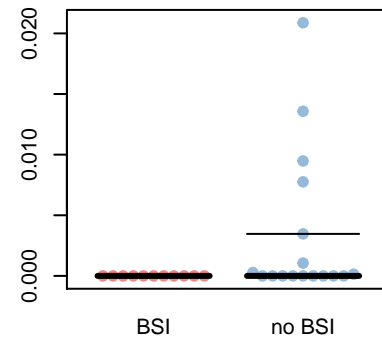**Christensenella**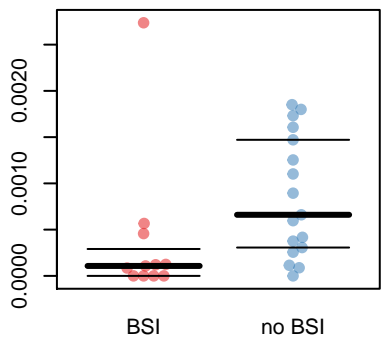**Oscillospira**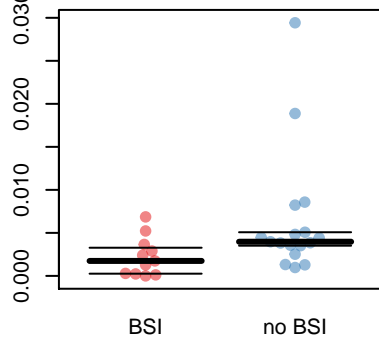**Butyricimonas**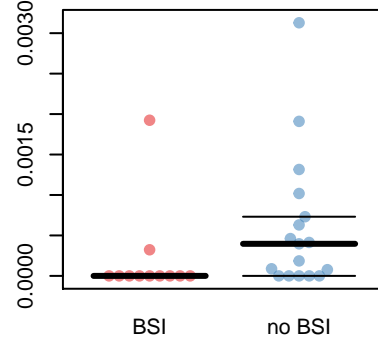**Veillonella**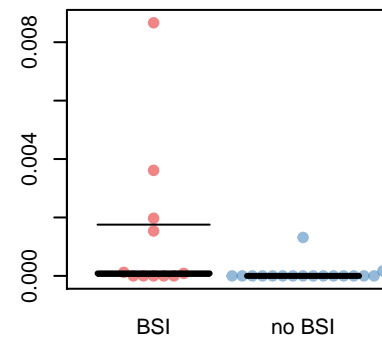

Supplement: 13073_2016_301_MOESM7_ESM.pdf [file 13073_2016_301_MOESM7_ESM.pdf]
