# Supplementary material for: Pretreatment gut microbiome predicts chemotherapy-related bloodstream infection
Source: PubMed Central journal article supplement (PMC4848771; doi:10.1186/s13073-016-0301-4), 2016-04-28
Supplement: 13073_2016_301_MOESM9_ESM.pdf [file 13073_2016_301_MOESM9_ESM.pdf]

|                                             | <b>Estimate</b> | <b>Standart Error</b> | <b>P-value</b> |
|---------------------------------------------|-----------------|-----------------------|----------------|
| <b>(Intercept)</b>                          | 23.50988        | 2399.54961            | 0.9922         |
| <b>Antibiotic prophylaxis penicillin V</b>  | -1.48463        | 1.09895               | 0.1767         |
| <b>Antibiotic prophylaxis Cotrimoxazole</b> | 1.63217         | 1.03467               | 0.1147         |
| <b>Chemotherapy previous use</b>            | -18.76785       | 2399.54562            | 0.9938         |
| <b>Delay of the Chemotherapy</b>            | -3.88820        | 2.14295               | 0.0696         |
| <b>Age of the patient</b>                   | -0.07561        | 0.05462               | 0.1663         |

**Additional file 9. Association between clinical characteristics of the patients and the outcome (BSI) based on a logistic regression model with backward elimination. BSI: Bloodstream Infection.**
